# Supplementary material for: First-Principles Study on Thermodynamic, Structural, Mechanical, Electronic, and Phonon Properties of tP16 Ru-Based Alloys
Source: MDPI journal article supplement (doi:10.3390/alloys3020007), 2024-04-15
Supplement: s1 [file s1]

## Supplementary material for tP16 article

**Table S1:** Calculated lattice constants ( $\text{\AA}$ ) in pure 3d-transition metal X and ruthenium.

| Transition metals | Lattice constants<br>$\text{\AA}$                             |
|-------------------|---------------------------------------------------------------|
| Sc                | 3.41<br>3.31 <sup>exp</sup> [1]                               |
| Ti                | 2.99<br>2.95 <sup>exp</sup> [1]                               |
| V                 | 3.03<br>3.03 <sup>exp</sup> [1]                               |
| Cr                | 2.845<br>2.851 <sup>theo</sup> [2]<br>2.88 <sup>exp</sup> [3] |
| Mn                | 8.91<br>8.91 <sup>exp</sup> [1]                               |
| Fe                | 2.88<br>2.87 <sup>exp</sup> [1]                               |
| Co                | 2.51<br>2.51 <sup>exp</sup> [1]                               |
| Ni                | 3.53<br>3.52 <sup>exp</sup> [1]                               |
| Cu                | 3.64<br>3.61 <sup>exp</sup> [1]                               |
| Zn                | 2.63                                                          |
| Ru                | 2.71<br>2.71 <sup>exp</sup> [1]                               |

[1] Introduction to Solid State Physics Charles Kittel, 2005.

[2] M.M. Tibane, Phase stability study of Pt-Cr and Ru-Cr binary alloys, (2011).

[3] S. Hong, C.L. Fu, Phase stability and elastic moduli of Cr<sub>2</sub>Nb by first-principles calculations, Intermetallics (Barking) 7 (1999) 5–9.

**Table S2:** Calculated lattice constants and magnetic moments in pure chromium, ruthenium and iron for different values of Hubbard  $U$  parameter.

| Cr                  |                                       |                                 |
|---------------------|---------------------------------------|---------------------------------|
| U-Parameter<br>(eV) | Lattice parameter<br>( $\text{\AA}$ ) | Magnetic moments<br>( $\mu_B$ ) |
| 0                   | 2.848052                              | 0.002                           |
| 1                   | 2.844156                              | 0.012                           |
| 1.5                 | 2.842541                              | 0.005                           |
| 2.0                 | 2.844156                              | 0.025                           |
| 2.5                 | 2.840457                              | 0.024                           |
| 3.0                 | 3.60161                               | 4.94311                         |
| 3.5                 | 3.62143                               | 4.99052                         |
| 4.0                 | 3.633813                              | 5.00475                         |

| 4.5                 | 3.648309                 | 5.032                           |
|---------------------|--------------------------|---------------------------------|
| Ru                  |                          |                                 |
| U-Parameter<br>(eV) | Lattice parameter<br>(Å) | Magnetic moments<br>( $\mu_B$ ) |
| 0                   | 2.71507                  | 0                               |
| 1                   | 2.70756                  | 0                               |
| 1.5                 | 2.707503                 | 0                               |
| 2.0                 | 2.703801                 | 0                               |
| 2.5                 | 2.70008                  | 0                               |
| 3.0                 | 2.696155                 | 0.04                            |
| 3.5                 | 2.692593                 | 0.04                            |
| 4.0                 | 2.689075                 | 0.04                            |
| 4.5                 | 2.683845                 | 0                               |
| Fe                  |                          |                                 |
| U-Parameter<br>(eV) | Lattice parameter<br>(Å) | Magnetic moments<br>( $\mu_B$ ) |
| 0                   | 2.812846                 | 0.0                             |
| 1                   | 2.851423                 | 2.52474                         |
| 1.5                 | 2.861893                 | 2.59111                         |
| 2.0                 | 2.866878                 | 2.612445                        |
| 2.5                 | 2.871924                 | 2.626665                        |
| 3.0                 | 2.880103                 | 2.65511                         |
| 3.5                 | 2.887744                 | 2.669335                        |
| 4.0                 | 2.899194                 | 2.701925                        |
| 4.5                 | 2.910362                 | 2.706665                        |
